# Supplementary material for: Genome-wide Screen of Otosclerosis in Population Biobanks: 18 Loci and Shared Heritability with Skeletal Structure
Source: bioRxiv or medRxiv preprint supplement (doi:10.1101/2020.11.15.20227868), 2020-11-16

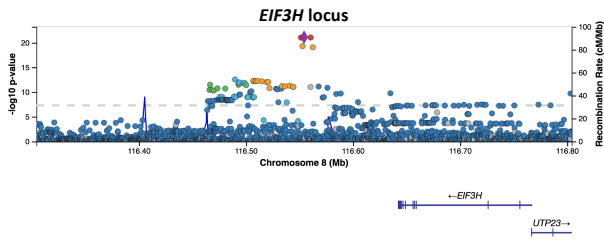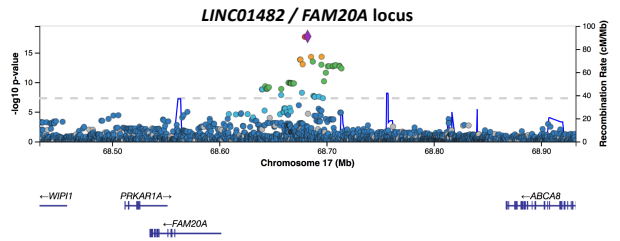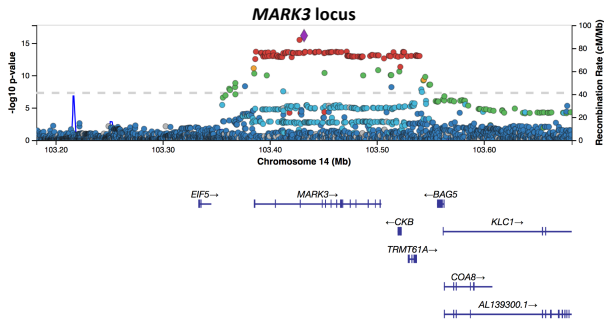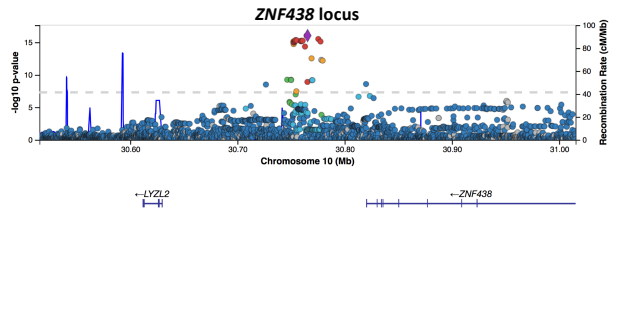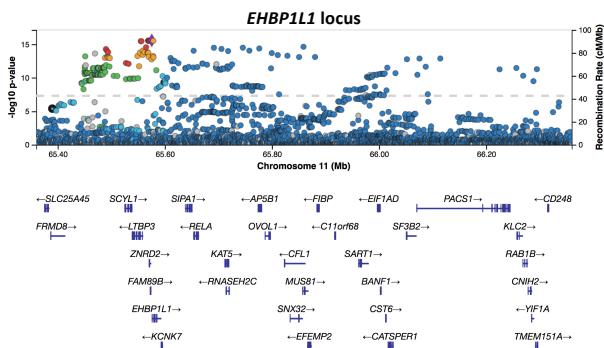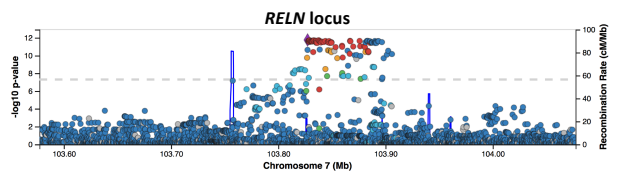

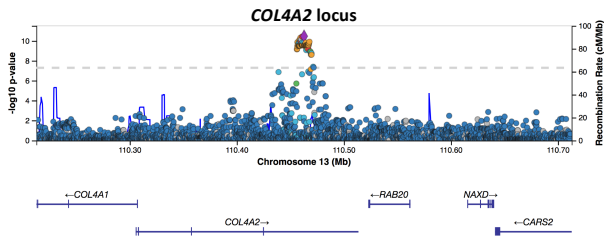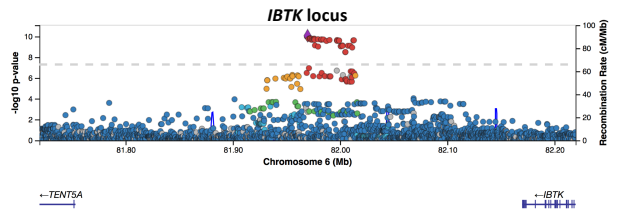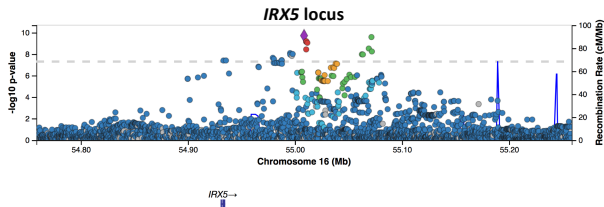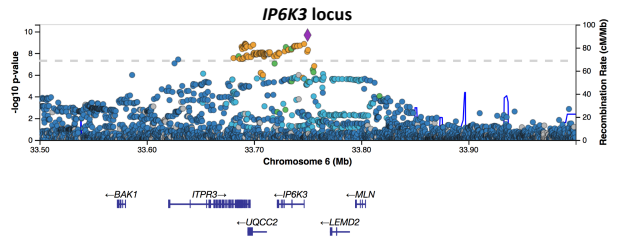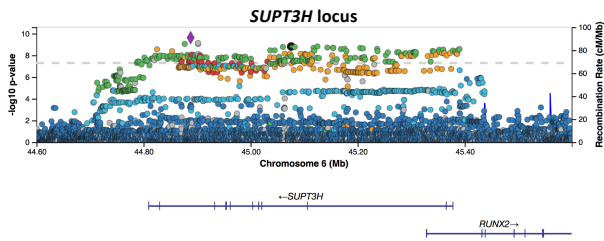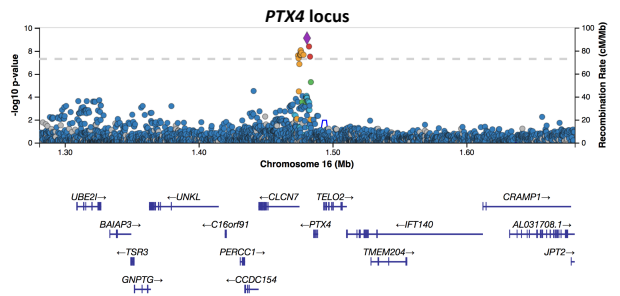

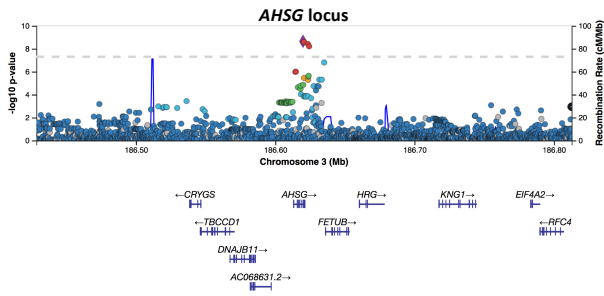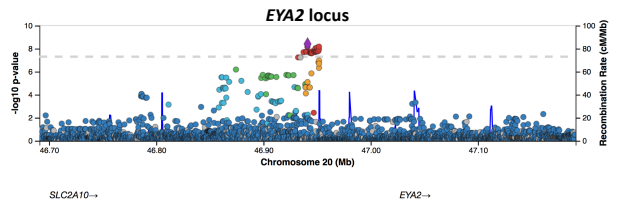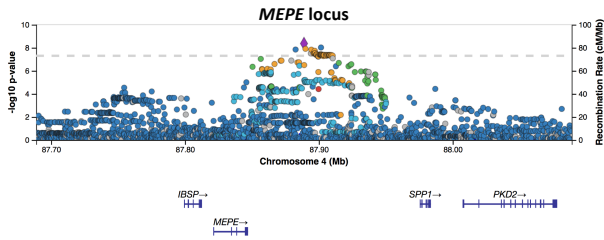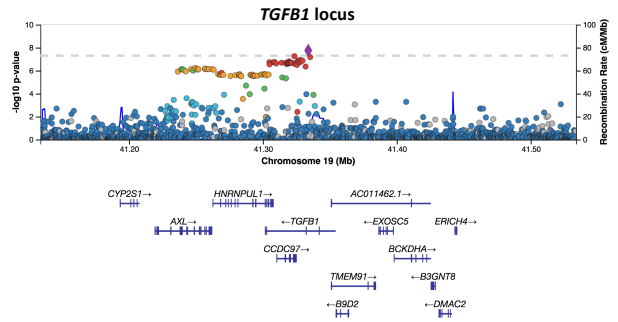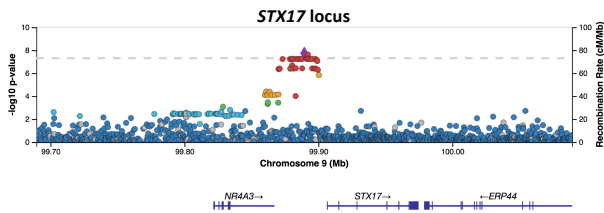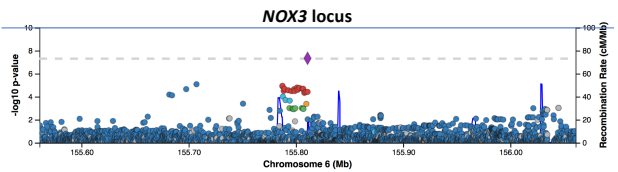

Supplement: Supplementary file [file media-5.pdf]
